# Supplementary material
Source: PubMed Central journal article supplement (PMC6075546)
Supplement: supplementalmethods.pdf [file supplementalmethods.pdf]

## Leone et al.: Supplemental Methods

### Genotyping of animals

The presence of Nestin Cre or Emx1-Cre was detected using the following primers:

|        |                              |
|--------|------------------------------|
| cre_as | 5'-AGGCTAAGTGCCTTCTCTACAC-3' |
| cre_s  | 5'-ACCAGGTTTCGTTACGCATGG-3'  |

For Emx1-Cre, the following primer pair was used to detect the wildtype Emx1 locus, in order to discriminate between hemizygous and homozygous Cre animals:

|               |                            |
|---------------|----------------------------|
| Emx1-Cre_wt_f | 5'-ACAATCAAGAGCCCACAAGG-3' |
| Emx1-Cre_wt_r | 5'-CTCTCCACCAGAAGGCTGAG-3' |

Ldb1 floxed alleles were genotyped using the following primer pair, resulting in a PCR product of approximately 300 bp for the floxed allele, and approximately 250 bp for the wildtype allele:

|        |                                      |
|--------|--------------------------------------|
| Ldb1_G | 5'-CTTATGTGACCACAGCCATGCATGCATGTG-3' |
| Ldb1_s | 5'-CAGCAAACGGAGGAAACGGAAGATGTCAG-3'  |

Ldb2 null alleles were detected using the following primers:

|           |                              |
|-----------|------------------------------|
| Ldb2_neo5 | 5'-CTGTGCTCGACGTTGTCAGT-3'   |
| Ldb2_neo3 | 5'-GATCCCCTCAGAAGAAGTTCGT-3' |

Ldb2 wildtype alleles were assayed using the following pair:

|         |                                   |
|---------|-----------------------------------|
| Ldb2_F2 | 5'-CAGACTGCTCATCACACTTGTGAT-3'    |
| Ldb2_R2 | 5'-CTCAAGAAATCCAAGGGGTGTTACTTA-3' |

The Z/EG allele was tested for using the following primer pair:

|           |                            |
|-----------|----------------------------|
| EGFP_F67  | 5'-GTAAACGGCCACAAGTTCAG-3' |
| EGFP_R641 | 5'-TCGTTGGGGTCTTTGCTCAG-3' |

Golli-t-GFP alleles were genotyped using the following primer pair:

Tau18F                    5'-GGAGTTCGACGTGATGGAAG-3'  
Tau219R                  5'-GGCTCCCTCATCCACTAAGG-3'

### **In situ hybridization probes**

PCR Primers used to generate probes for in situ hybridization are listed in pairs with the forward primer listed first. All reverse primers have the T7 promoter sequence (5'-gcgcgtaatacgaactactatagggc-3') added to their 5' end.

Diap3                    5'-agcagttcgctgttgatg-3'  
                              5'-gcacgtttctcctttctgc-3'

EphA4                    5'-atttcccgctcagaggctttt-3'  
                              5'-cgaaggggacttgacacatt-3'

EphA6                    5'-ccctggtgatgttctgaat-3'  
                              5'-ctcgggagctactcgatcac-3'

Foxo1                    5'-tattgagcgcttgactgtg-3'  
                              5'-tgccccaagtttgacaagt-3'

Foxp2                    5'-ttgcttacttcaggcggaaat-3'  
                              5'-ttggttctgaatcccaaagg-3'

Igfbp4                    5'-gacctggcttgagctgag-3'  
                              5'-ctgcaggctcagagtatga-3'

Ldb2                     5'-ccctattccccgtttttt-3'  
                              5'-agaaggggtcactgctgttg-3'

Liprin b1                5'-gagcagtttgagcttgac-3'  
                              5'-tgaaatcatgaatgggagca-3'

Nrp1                     5'-ccaatcagagttcccacat-3'  
                              5'-ccagggcagataggttcctt-3'

PlxnA2            5'-ggcaagctgaagaagattcg-3'  
                      5'-acattgatcctgccttctg-3'

PlxnA3            5'-tggtgtcccatgtcagaag-3'  
                      5'-agacatgcactgacccatt-3'

PlxnA4            5'-cagggtcagaaaggatgag-3'  
                      5'-catttcacggtgagtgttg-3'

Slc6a7            5'-ccaagaaggcagtgttctc-3'  
                      5'-agggacttatgctggggact-3'

Tle4                5'-gctattgccaactggagag-3'  
                      5'-gaggggtggagcatcaaata-3'
